# Supplementary material
Source: ML conference proceedings conference paper supplement (https://proceedings.mlr.press/v77/brouard17a.html)
Supplement: Supplementary file [file brouard17a-supp.pdf]

# Supplementary materials: Magnitude-preserving ranking for structured outputs

Céline Brouard<sup>1</sup>   Eric Bach<sup>1</sup>   Sebastian Böcker<sup>2</sup>   Juho Rousu<sup>1</sup>

<sup>1</sup> Helsinki Institute for Information Technology, Department of Computer Science, Aalto University, Espoo, Finland

<sup>2</sup> Chair for Bioinformatics, Friedrich-Schiller University, Jena, Germany

## 1 Proof of Theorem 1

**Theorem 1.** *The solution of the optimization problem:*

$$\operatorname{argmin}_{h \in \mathcal{H}} \sum_{i=1}^{\ell} \frac{1}{n_i} \sum_{j \in C_i} \|(h(x_i) - h(x_j)) - (\psi(y_i) - \psi(y_j))\|_{\mathcal{F}_y}^2 + \lambda \|h\|_{\mathcal{H}}^2, \quad \lambda > 0, \quad (1)$$

*admits a representation of the form:*

$$\forall x \in \mathcal{X}, h(x) = \sum_{i \in S \cup C} \mathcal{K}_x(x, x_i) \mathbf{c}_i, \quad \mathbf{c}_i \in \mathcal{F}_y.$$

*Proof.* We consider the space of functions

$$\mathcal{H}_0 = \{h \in \mathcal{H} | h(\cdot) = \sum_{i \in S \cup C} \mathcal{K}_x(\cdot, x_i) \mathbf{c}_i\}$$

and its orthogonal complement

$$\mathcal{H}_0^\perp = \{g \in \mathcal{H} | \langle g(\cdot), h(\cdot) \rangle_{\mathcal{H}} = 0, \forall h \in \mathcal{H}_0\}.$$

Any function  $h \in \mathcal{H}$  can be decomposed as a sum of two functions, one belonging to  $\mathcal{H}_0$  and the other to  $\mathcal{H}_0^\perp$ :  $h = h_0 + h_0^\perp$ .

By using the reproducing property we observe that the evaluation of a function  $h$  on any point  $x \in S \cup C$  is independent of  $h_0^\perp$ :

$$\forall x \in S \cup C, h(x) = \langle h_0, \mathcal{K}_x(\cdot, x) \rangle_{\mathcal{H}} + \langle h_0^\perp, \mathcal{K}_x(\cdot, x) \rangle_{\mathcal{H}} = h_0(x).$$

For the regularization term, we use the fact that  $h_0^\perp$  is orthogonal to  $h_0$  to show that:

$$\|h\|_{\mathcal{H}}^2 = \|h_0\|_{\mathcal{H}}^2 + \|h_0^\perp\|_{\mathcal{H}}^2.$$

Using these two properties, we can express the objective function as:  $\mathcal{J}(h) = \mathcal{J}(h_0) + \lambda \|h_0^\perp\|_{\mathcal{H}}^2$ . This means that the minimizer  $h$  of Equation (1) must have  $h_0^\perp = 0$  and therefore admits a representation of the form:  $h(\cdot) = \sum_{i \in S \cup C} \mathcal{K}_x(\cdot, x_i) \mathbf{c}_i, \quad \mathbf{c}_i \in \mathcal{F}_y$ .  $\square$

## 2 Proof of Theorem 2

**Theorem 2.** *The optimization problem (5) can be rewritten under the following form:*

$$\mathcal{J}(h) = \lambda \|h\|_{\mathcal{H}}^2 + \sum_{j \in \text{SUC}} \|W\phi'(x_j) - \psi'(y_j)\|_{\mathcal{F}_y}^2. \quad (2)$$

The modified input feature vectors are defined as:

$$\phi'(x_j) = \begin{cases} \phi(x_j) - \bar{\phi}_{C_j} & \text{if } j \in S \\ \frac{1}{\sqrt{n_i}} (\phi(x_j) - \bar{\phi}_{C_i}) & \text{if } j \in C_i \end{cases},$$

where  $\bar{\phi}_{C_i} = \frac{1}{n_i} \sum_{j \in C_i} \phi(x_j)$ . The modified output feature vectors are defined similarly.

*Proof.* We show the equality between  $\sum_{j \in \{i\} \cup C_i} \|W\phi'(x_j) - \psi'(y_j)\|_{\mathcal{F}_y}^2$  and  $\frac{1}{n_i} \sum_{j \in C_i} \|(h(x_i) - h(x_j)) - (\psi(y_i) - \psi(y_j))\|_{\mathcal{F}_y}^2$ :

$$\begin{aligned} & \sum_{j \in \{i\} \cup C_i} \|W\phi'(x_j) - \psi'(y_j)\|_{\mathcal{F}_y}^2 \\ &= \|W(\phi(x_i) - \bar{\phi}_{C_i}) - (\psi(y_i) - \bar{\psi}_{C_i})\|_{\mathcal{F}_y}^2 + \frac{1}{n_i} \sum_{j \in C_i} \|W(\phi(x_j) - \bar{\phi}_{C_i}) - (\psi(y_j) - \bar{\psi}_{C_i})\|_{\mathcal{F}_y}^2 \\ &= \|(h(x_i) - \bar{h}_{C_i}) - (\psi(y_i) - \bar{\psi}_{C_i})\|_{\mathcal{F}_y}^2 + \frac{1}{n_i} \sum_{j \in C_i} \|(h(x_j) - \bar{h}_{C_i}) - (\psi(y_j) - \bar{\psi}_{C_i})\|_{\mathcal{F}_y}^2 \\ &= \|h(x_i) - \psi(y_i)\|_{\mathcal{F}_y}^2 + \|\bar{h}_{C_i} - \bar{\psi}_{C_i}\|_{\mathcal{F}_y}^2 - 2(h(x_i) - \psi(y_i))^T (\bar{h}_{C_i} - \bar{\psi}_{C_i}) \\ & \quad + \frac{1}{n_i} \sum_{j \in C_i} \left( \|h(x_j) - \psi(y_j)\|_{\mathcal{F}_y}^2 + \|\bar{h}_{C_i} - \bar{\psi}_{C_i}\|_{\mathcal{F}_y}^2 - 2(h(x_j) - \psi(y_j))^T (\bar{h}_{C_i} - \bar{\psi}_{C_i}) \right) \\ &= \|h(x_i) - \psi(y_i)\|_{\mathcal{F}_y}^2 + \|\bar{h}_{C_i} - \bar{\psi}_{C_i}\|_{\mathcal{F}_y}^2 - 2(h(x_i) - \psi(y_i))^T (\bar{h}_{C_i} - \bar{\psi}_{C_i}) \\ & \quad + \frac{1}{n_i} \sum_{j \in C_i} \|h(x_j) - \psi(y_j)\|_{\mathcal{F}_y}^2 + \|\bar{h}_{C_i} - \bar{\psi}_{C_i}\|_{\mathcal{F}_y}^2 - 2\left(\sum_{j \in C_i} h(x_j) - \psi(y_j)\right)^T (\bar{h}_{C_i} - \bar{\psi}_{C_i}) \\ &= \|h(x_i) - \psi(y_i)\|_{\mathcal{F}_y}^2 + \frac{1}{n_i} \sum_{j \in C_i} \|h(x_j) - \psi(y_j)\|_{\mathcal{F}_y}^2 - 2(h(x_i) - \psi(y_i))^T (\bar{h}_{C_i} - \bar{\psi}_{C_i}) \\ &= \frac{1}{n_i} \sum_{j \in C_i} \|(h(x_i) - \psi(y_i)) - (h(x_j) - \psi(y_j))\|_{\mathcal{F}_y}^2 \\ &= \frac{1}{n_i} \sum_{j \in C_i} \|(h(x_i) - h(x_j)) - (\psi(y_i) - \psi(y_j))\|_{\mathcal{F}_y}^2. \end{aligned}$$

□

## 3 Proof of Proposition 4

When replacing the matrices containing candidate input feature vectors by their approximation given in Equation (9):  $\Phi_C = \Phi_S M \Psi_S^T \Psi_C$  and  $\bar{\Phi}_C = \Phi_S M \Psi_S^T \bar{\Psi}_C$ , the expression of  $\Phi'$  becomes:

$$\begin{aligned} \Phi' &= [\Phi_S - \Phi_S M \Psi_S^T \bar{\Psi}_C, (\Phi_S M \Psi_S^T \Psi_C - \Phi_S M \Psi_S^T \bar{\Psi}_C V^T) D_n] \\ &= \Phi_S [I_\ell - M \Psi_S^T \bar{\Psi}_C, M \Psi_S^T (\Psi_C - \bar{\Psi}_C V^T) D_n]. \end{aligned}$$

We note  $A = [I_\ell - M \Psi_S^T \bar{\Psi}_C, M \Psi_S^T (\Psi_C - \bar{\Psi}_C V^T) D_n]$  and replace the expression of  $\Phi'$  in the solution:

$$W = \Psi' (\lambda I_{\ell+n} + A^T K_{X_S} A)^{-1} A^T \Phi_S^T = \Psi' A^T (\lambda I_\ell + K_{X_S} A A^T)^{-1} \Phi_S^T.$$

## 4 Proof of Proposition 5

We replace the candidate input feature vectors by their approximation and use the fact that the training input feature vectors can be expressed as:  $\Phi_S = D_{\Phi_S} \mathbf{I}$ .

$$\begin{aligned}\Phi' &= [\Phi_S - \bar{\Phi}_C, (\Phi_C - \bar{\Phi}_C V^T) D_n] \\ &= [D_{\Phi_S} \mathbf{I} - D_{\Phi_S} \mathbf{M} \Psi_S^T \bar{\Psi}_C, (D_{\Phi_S} \mathbf{M} \Psi_S^T \Psi_C - D_{\Phi_S} \mathbf{M} \Psi_S^T \bar{\Psi}_C V^T) D_n] \\ \Phi' &= D_{\Phi_S} [\mathbf{I} - \mathbf{M} \Psi_S^T \bar{\Psi}_C, \mathbf{M} \Psi_S^T (\Psi_C - \bar{\Psi}_C V^T) D_n].\end{aligned}$$

We note  $A = [\mathbf{I} - \mathbf{M} \Psi_S^T \bar{\Psi}_C, \mathbf{M} \Psi_S^T (\Psi_C - \bar{\Psi}_C V^T) D_n]$ . Given the expression of  $\Phi'$ , the solution can be rewritten as follows:

$$W = \Psi' (\lambda I_{\ell+n} + A^T D_{\Phi_S}^T D_{\Phi_S} A)^{-1} A^T D_{\Phi_S}^T = \Psi' A^T (\lambda I_{\ell K} + D_{K_{X_S}} A A^T)^{-1} D_{\Phi_S}^T,$$

where  $D_{K_{X_S}} = \text{diag}(\mu_1 K_{X_S}^1, \dots, \mu_k K_{X_S}^k)$ .
